# Supplementary material for: Patient Selection for Routine Troponin Monitoring After Noncardiac Surgery
Source: PubMed Central journal article supplement — J Am Heart Assoc. 2021 Jul 3;10(14):e019912. doi: 10.1161/JAHA.120.019912 (PMC8483467; doi:10.1161/jaha.120.019912), 2021-07-03
Supplement: JAH3-10-e019912-s001.pdf [file JAH3-10-e019912-s001.pdf]

# **Supplemental Material**

**Table S1. The numbers of patients with perioperative myocardial infarction (POMI) and other myocardial injury, the absolute risk of POMI, and the number needed to screen (NNS) to identify one patient with POMI are given for each node in the original tree. On the right side of the table, the numbers and risks with 95% confidence intervals as obtained from bootstrap samples are given.**

|         | ORIGINAL TREE |                         |               |      |               |     | BOOTSTRAP SAMPLES |               |                         |           |           |             |        |           |           |             |     |          |
|---------|---------------|-------------------------|---------------|------|---------------|-----|-------------------|---------------|-------------------------|-----------|-----------|-------------|--------|-----------|-----------|-------------|-----|----------|
|         | All patients  | Other Myocardial Injury |               | POMI |               |     | All patients      |               | Other Myocardial Injury |           |           |             | POMI   |           |           |             |     |          |
|         | N             | N                       | Absolute risk | N    | Absolute risk | NNS | Mean N            | (95% CI)      | Mean N                  | (95% CI)  | Mean risk | (95% CI)    | Mean N | (95% CI)  | Mean risk | (95% CI)    | NNS | (95% CI) |
| Node 1  | 5,590         | 842                     | 0.15          | 216  | 0.04          | 26  | 5,590             | (5,590-5,590) | 843                     | (838-848) | 0.15      | (0.15-.015) | 215    | (212-218) | 0.04      | (0.04-0.04) | 26  | (26-26)  |
| Node 2  | 4,324         | 518                     | 0.12          | 103  | 0.02          | 42  | 4,324             | (4,318-4,329) | 518                     | (514-522) | 0.12      | (0.12-0.12) | 103    | (102-105) | 0.02      | (0.02-0.02) | 42  | (41-43)  |
| Node 3  | 1,266         | 324                     | 0.26          | 113  | 0.09          | 11  | 1,266             | (1,261-1,272) | 325                     | (322-328) | 0.26      | (0.25-0.26) | 112    | (110-114) | 0.09      | (0.09-0.09) | 11  | (11-12)  |
| Node 4  | 3,411         | 333                     | 0.10          | 57   | 0.02          | 60  | 3,409             | (3,404-3,416) | 332                     | (329-336) | 0.10      | (0.10-0.10) | 57     | (56-59)   | 0.02      | (0.02-0.02) | 61  | (59-62)  |
| Node 5  | 913           | 185                     | 0.20          | 46   | 0.05          | 20  | 914               | (909-919)     | 186                     | (183-188) | 0.20      | (0.20-0.21) | 46     | (45-48)   | 0.05      | (0.05-0.05) | 20  | (20-21)  |
| Node 6  | 940           | 205                     | 0.22          | 57   | 0.06          | 17  | 942               | (937-946)     | 207                     | (204-209) | 0.22      | (0.22-0.22) | 55     | (54-57)   | 0.06      | (0.06-0.06) | 17  | (17-18)  |
| Node 7  | 326           | 119                     | 0.36          | 56   | 0.17          | 6   | 325               | (321-328)     | 119                     | (117-121) | 0.37      | (0.36-0.37) | 56     | (55-58)   | 0.17      | (0.17-0.18) | 6   | (6-6)    |
| Node 8  | 666           | 119                     | 0.18          | 23   | 0.03          | 29  | 668               | (663-672)     | 121                     | (119-123) | 0.18      | (0.18-0.18) | 23     | (22-24)   | 0.04      | (0.03-0.04) | 30  | (29-32)  |
| Node 9  | 247           | 66                      | 0.27          | 23   | 0.10          | 11  | 246               | (243-249)     | 65                      | (63-66)   | 0.26      | (0.26-0.27) | 23     | (22-24)   | 0.09      | (0.09-0.10) | 11  | (11-12)  |
| Node 10 | 823           | 164                     | 0.20          | 43   | 0.05          | 19  | 825               | (820-830)     | 165                     | (163-167) | 0.20      | (0.20-0.20) | 42     | (40-43)   | 0.05      | (0.05-0.05) | 20  | (20-21)  |
| Node 11 | 117           | 41                      | 0.35          | 14   | 0.12          | 9   | 117               | (114-119)     | 41                      | (40-43)   | 0.36      | (0.35-0.37) | 14     | (13-14)   | 0.12      | (0.11-0.12) | 9   | (9-10)   |
| Node 12 | 151           | 39                      | 0.26          | 28   | 0.18          | 5   | 150               | (148-152)     | 39                      | (38-40)   | 0.26      | (0.25-0.27) | 28     | (27-29)   | 0.18      | (0.18-0.19) | 6   | (5-6)    |
| Node 13 | 175           | 79                      | 0.45          | 29   | 0.16          | 6   | 175               | (172-177)     | 80                      | (78-81)   | 0.46      | (0.45-0.46) | 29     | (27-30)   | 0.16      | (0.16-0.17) | 6   | (6-7)    |
| Node 14 | 128           | 26                      | 0.20          | 7    | 0.06          | 17  | 128               | (126-130)     | 25                      | (24-26)   | 0.20      | (0.19-0.20) | 7      | (7-8)     | 0.06      | (0.05-0.06) | 20  | (19-22)  |
| Node 15 | 119           | 40                      | 0.34          | 16   | 0.14          | 7   | 118               | (117-120)     | 40                      | (39-41)   | 0.34      | (0.33-0.34) | 16     | (15-17)   | 0.13      | (0.13-0.14) | 8   | (8-9)    |
| Node 16 | 42            | 12                      | 0.28          | 3    | 0.08          | 13  | 42                | (41-43)       | 12                      | (11-12)   | 0.28      | (0.27-0.30) | 3      | (3-4)     | 0.08      | (0.07-0.08) | ∞   | NA       |
| Node 17 | 75            | 30                      | 0.40          | 10   | 0.14          | 7   | 74                | (73-76)       | 30                      | (29-31)   | 0.40      | (0.39-0.41) | 10     | (10-11)   | 0.14      | (0.13-0.15) | 8   | (7-8)    |
| Node 18 | 37            | 5                       | 0.14          | 3    | 0.08          | 13  | 38                | (36-39)       | 6                       | (5-6)     | 0.15      | (0.14-0.16) | 3      | (3-3)     | 0.08      | (0.07-0.09) | ∞   | NA       |
| Node 19 | 114           | 34                      | 0.30          | 25   | 0.22          | 5   | 112               | (110-115)     | 33                      | (32-34)   | 0.30      | (0.29-0.31) | 25     | (24-26)   | 0.22      | (0.21-0.23) | 5   | (5-5)    |
| Node 20 | 149           | 73                      | 0.49          | 18   | 0.12          | 8   | 149               | (147-152)     | 74                      | (72-75)   | 0.49      | (0.49-0.50) | 18     | (17-19)   | 0.12      | (0.12-0.13) | 9   | (8-9)    |
| Node 21 | 26            | 6                       | 0.23          | 11   | 0.42          | 2   | 26                | (25-27)       | 6                       | (6-7)     | 0.24      | (0.22-0.26) | 11     | (10-11)   | 0.42      | (0.40-0.44) | 3   | (2-3)    |
| Node 22 | 95            | 25                      | 0.27          | 14   | 0.14          | 7   | 94                | (92-96)       | 25                      | (24-26)   | 0.27      | (0.26-0.28) | 13     | (13-14)   | 0.14      | (0.13-0.15) | 8   | (7-8)    |
| Node 23 | 24            | 15                      | 0.61          | 2    | 0.10          | 10  | 24                | (23-25)       | 15                      | (14-15)   | 0.60      | (0.58-0.62) | 2      | (2-3)     | 0.10      | (0.09-0.12) | ∞   | NA       |
| Node 24 | 53            | 21                      | 0.40          | 4    | 0.07          | 14  | 52                | (51-54)       | 21                      | (20-22)   | 0.40      | (0.38-0.41) | 4      | (3-4)     | 0.07      | (0.07-0.08) | ∞   | NA       |
| Node 25 | 22            | 9                       | 0.39          | 6    | 0.29          | 3   | 22                | (21-23)       | 9                       | (8-9)     | 0.40      | (0.37-0.42) | 7      | (6-7)     | 0.30      | (0.28-0.33) | 4   | (3-4)    |
| Node 26 | 81            | 19                      | 0.24          | 18   | 0.22          | 5   | 80                | (78-81)       | 19                      | (18-20)   | 0.24      | (0.23-0.25) | 17     | (16-18)   | 0.21      | (0.21-0.22) | 5   | (5-5)    |
| Node 27 | 33            | 15                      | 0.45          | 7    | 0.22          | 5   | 33                | (32-34)       | 14                      | (14-15)   | 0.43      | (0.42-0.45) | 8      | (7-8)     | 0.23      | (0.21-0.25) | 5   | (5-6)    |
